# Supplementary material for: Characterization of the Humoral Immune Response to Porcine Epidemic Diarrhea Virus Infection under Experimental and Field Conditions Using an AlphaLISA Platform
Source: PubMed Central journal article supplement (PMC7157568; doi:10.3390/pathogens9030233), 2020-03-21
Supplement: pathogens-09-00233-s001.pdf [file pathogens-09-00233-s001.pdf]

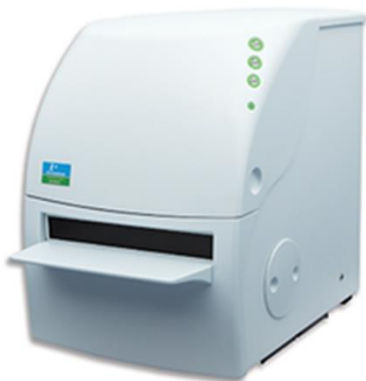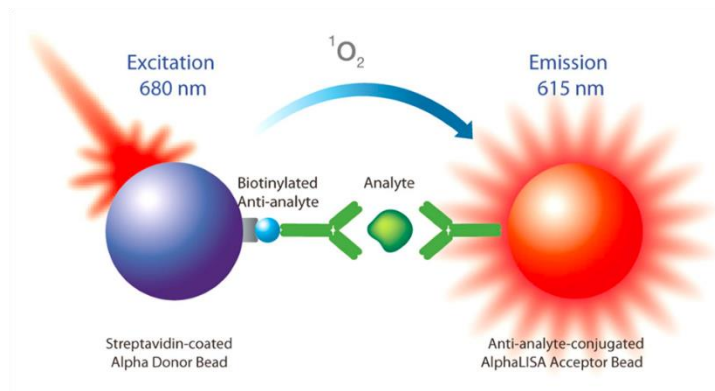

**Figure S1.** Overall principle of the AlphaLISA assay technology, and image of the EnVision® 2105 multimode microplate reader used in this study.
